# Supplementary material
Source: PubMed Central journal article supplement (PMC2626153)
Supplement: NIHMS70447-supplement-supplementary.pdf [file NIHMS70447-supplement-supplementary.pdf]

## Legends to Supplementary Figures.

**Figure 1.** Low magnification of light photomicrographs of methylene blue-stained sections of the retina encompassing the central region of 24-week old *RanBP2*<sup>+/+</sup> (a) and *RanBP2*<sup>+/-</sup> mice (b). There is a strong increase in pyknotic nuclei in the outer nuclear layer, vacuolization of the inner segments and disorganization of these and the rod outer segments in wild-type mice compared with *RanBP2*<sup>+/-</sup> mice. Vacuolization was apparent also in the inner retina of wild-type mice.

Legend: RPE, retina pigment epithelium; ROS, rod outer segment of photoreceptors; RIS, rod inner segment of photoreceptors; ONL, outer nuclear layer (nuclei of photoreceptors), INL, inner nuclear layer; IPL, inner plexiform layer; GC, ganglion cell layer. Scale bar, 60  $\mu$ m.

**Figure 2.** Electron micrograph of 12-week old *RanBP2*<sup>+/+</sup> mice reared under low light (<70 lux). The photoreceptors present normal ultrastructural morphology.

Legend: star, nucleus of a cone photoreceptor; scale bar, 6  $\mu$ m.

**Figure 3.** Quantitative morphometric analyses of apoptosis of photoreceptors in central (C) and peripheral (P) regions of age- and genotype-matched retinas of 12- and 24-week old wild-type mice and *RanBP2*<sup>+/-</sup> mice. Apoptosis is prominent in the central region of the retina in 12- and 24-week old wild-type mice and it increases with age in *RanBP2*<sup>+/+</sup>, but not *RanBP2*<sup>+/-</sup> mice. Results shown represent the mean  $\pm$  S.D. ( $n=4$ ).
