# Supplementary material
Source: PubMed Central journal article supplement (PMC2626153)

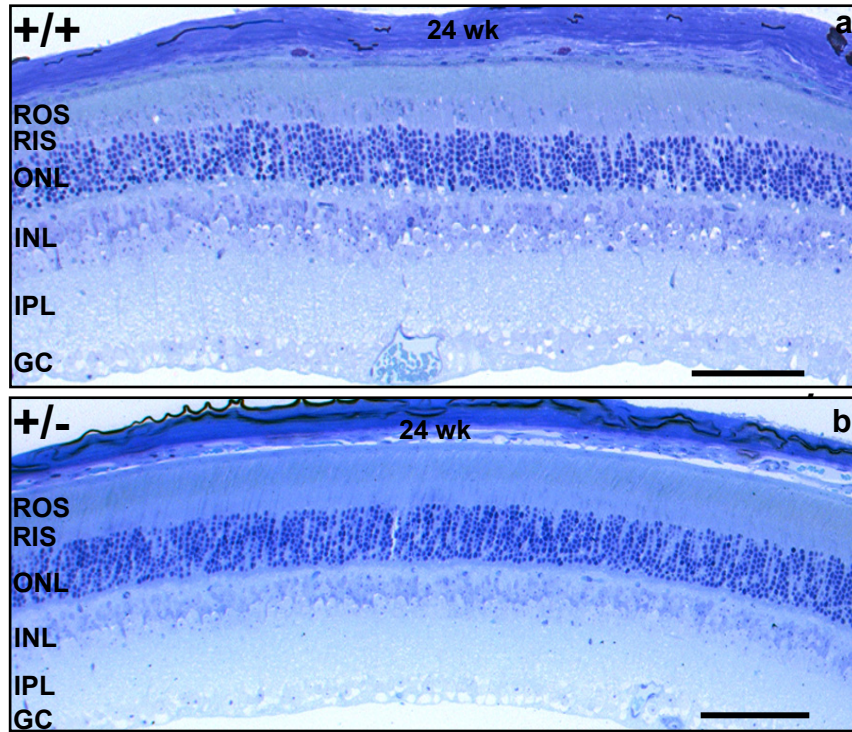

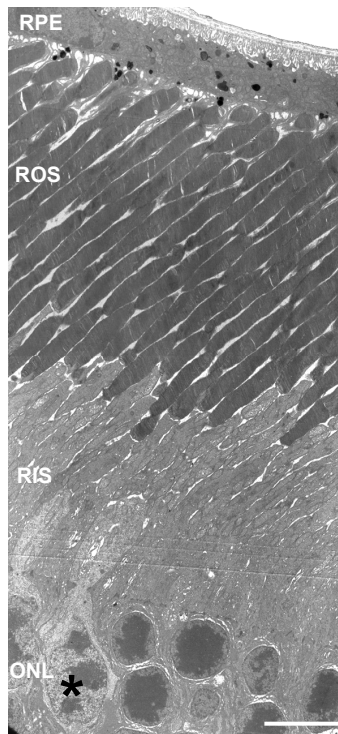

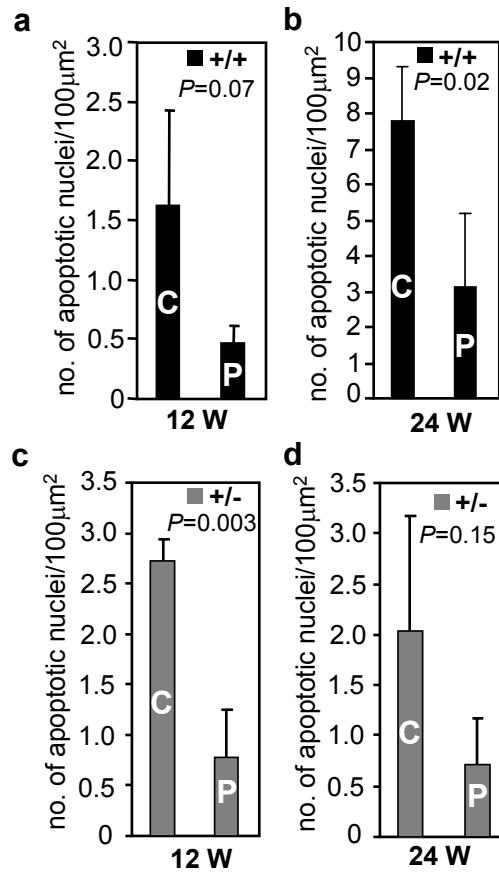

Supplement: NIHMS70447-supplement-supplement_1.pdf [file NIHMS70447-supplement-supplement_1.pdf]
